# Supplementary material for: Murine Corneal Inflammation and Nerve Damage After Infection With HSV-1 Are Promoted by HVEM and Ameliorated by Immune-Modifying Nanoparticle Therapy
Source: PubMed Central journal article supplement — Invest Ophthalmol Vis Sci. 2017 Jan;58(1):282–91. doi: 10.1167/iovs.16-20668 (PMC5256684; doi:10.1167/iovs.16-20668), 2017-01
Supplement: iovs-57-15-42_s01.pdf [file iovs-57-15-42_s01.pdf]

## Supplemental Figures & Figure Legends

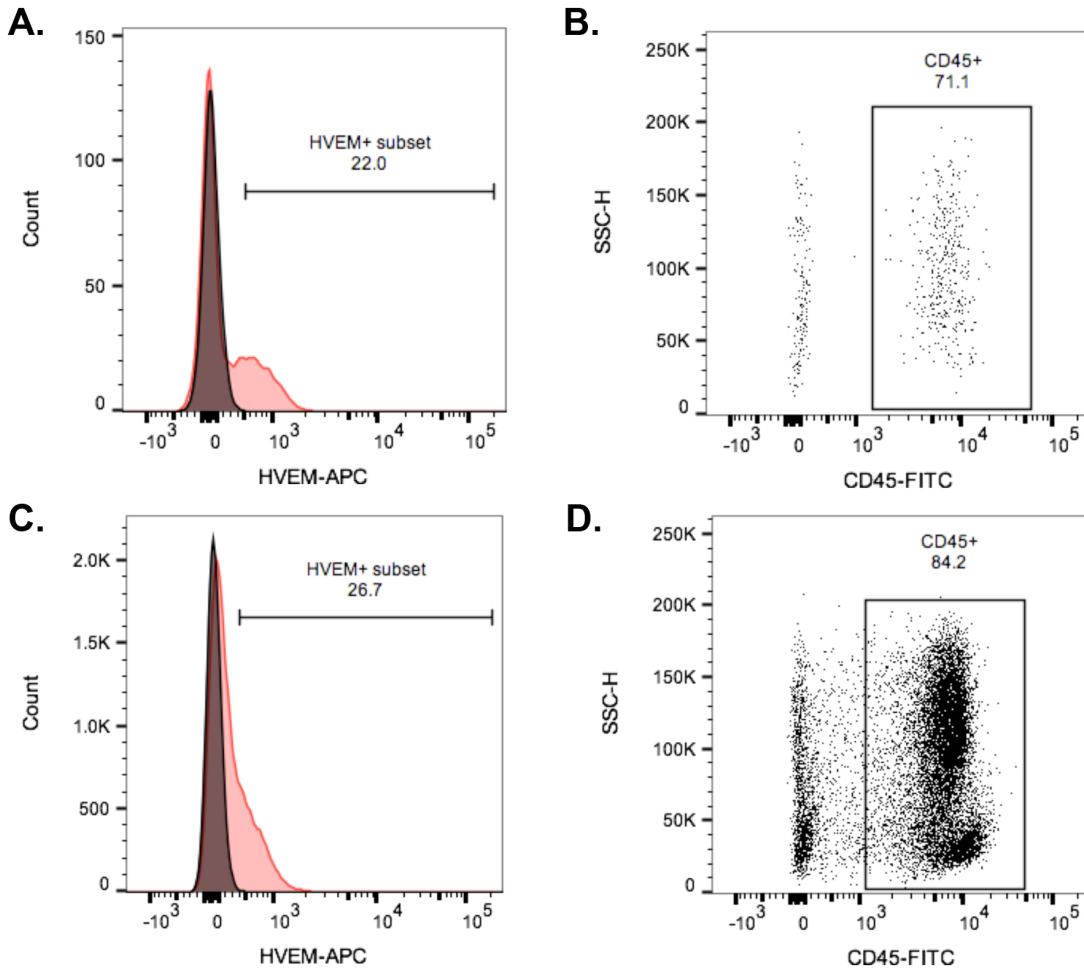

**Figure S1.** Flow cytometry analysis of HVEM expression in the HSV-1-infected murine cornea. **(A)** Representative histogram comparing HVEM expression in WT (red curve) and HVEM KO (black curve) corneas 3 dpi or **(C)** 14 dpi with HSV-1(17). Threshold for HVEM expression was set with an isotype control, FMO control, and HVEM KO sample from the same time point. **(B)** Representative dot plot of CD45 expression in live, HVEM<sup>+</sup> cells from a WT sample 3 dpi or **(D)** 14 dpi.

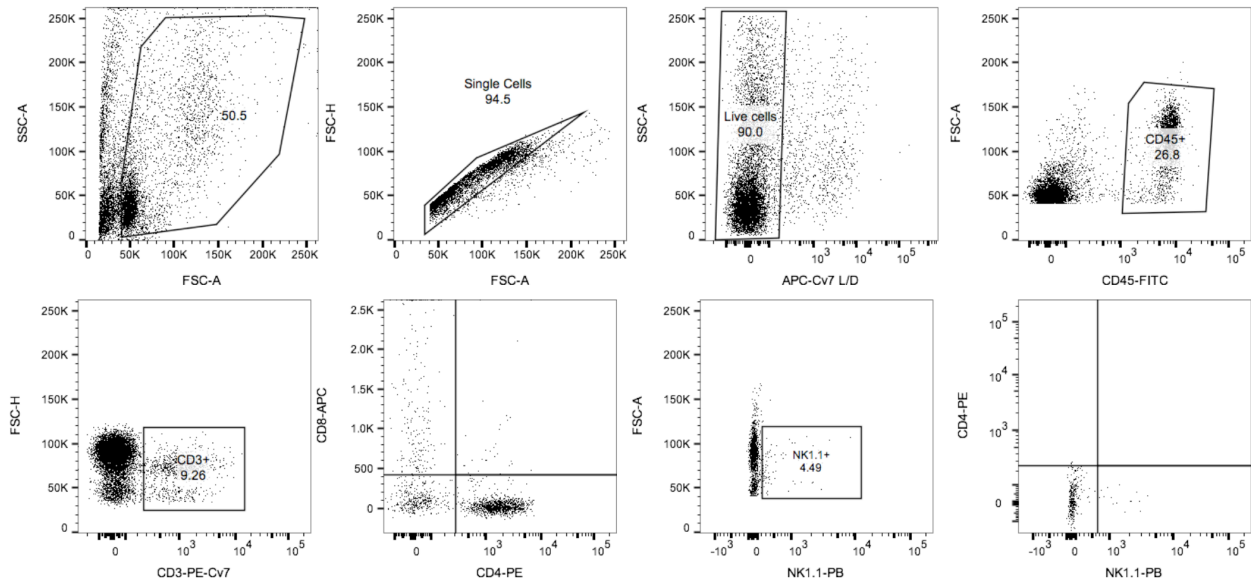

**Figure S2. Gating strategy for lymphoid cell populations.** Whole corneas were assessed by flow cytometry. Cell populations were gated according to FSC-SSC, then restricted to singlets, live cells, CD45<sup>+</sup> cells, CD3<sup>+</sup> cells, and then were segregated into CD4 versus CD8 populations or NK1.1<sup>+</sup> or NK1.1<sup>-</sup> populations. Cells negative for CD4, CD8, and NK1.1 were considered DN cells.

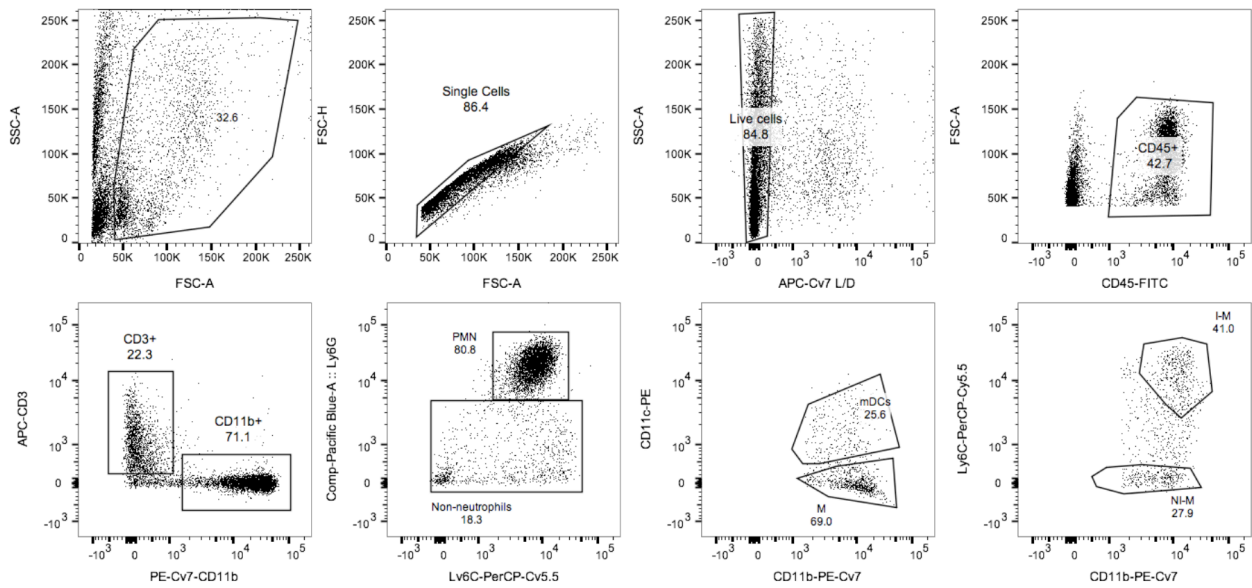

**Figure S3. Gating strategy for myeloid cell populations.** Whole corneas were assessed by flow cytometry. Cell populations were gated according to FSC-SSC, then restricted to singlets, live cells, and CD11b<sup>+</sup> cells. Neutrophils were classified as the Ly6C<sup>i</sup> Ly6<sup>+</sup> population. The rest of cells were then separated into myeloid DCs, monocytes/macrophages, inflammatory monocytes/macrophages, and non-inflammatory monocytes/macrophages populations as shown above.

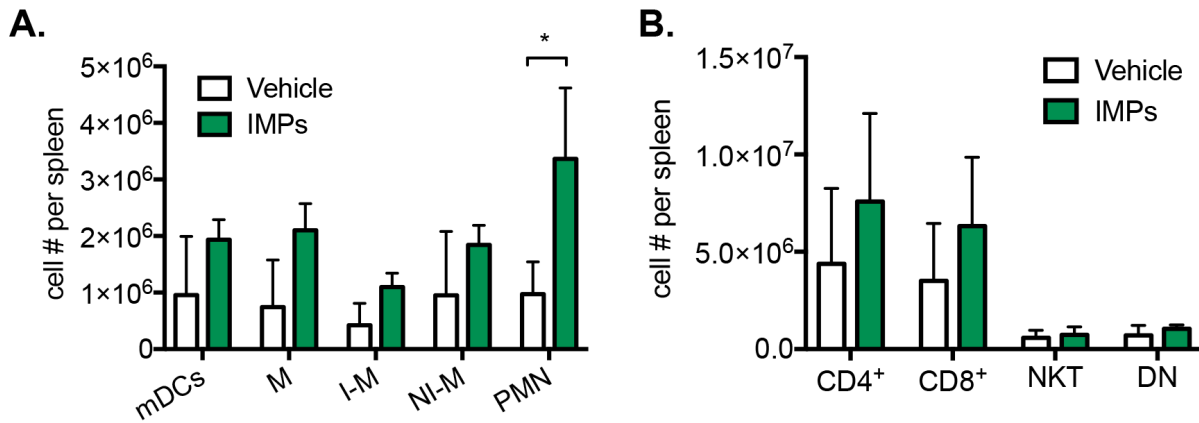

**Figure S4. Treatment with IMPs significantly increases the number of PMN, tended to increase other leukocytic populations, in the spleens of C57BL/6 mice.** WT mice were infected with  $2.0 \times 10^6$  PFU/5  $\mu$ l per eye after corneal scarification with HSV-1(17) and treated with either IMPs or vehicle (PBS) intravenously 3-7 dpi. Less than 24 hours after the last dose (day 8), the spleens of a subset of the group were harvested and prepared for flow. (A and B) Absolute number of the indicated cell types in WT treated or mock-treated mice ( $n = 4$ , means  $\pm$  SEMs, two tailed  $t$  test with Holm-Sidak's correction for multiple comparisons). \*,  $P \leq 0.05$ .
